# Supplementary material for: Measurement report: Evaluation of the TOF-ACSM-CV for PM 1.0 and PM 2.5 measurements during the RITA-2021 field campaign
Source: Copernicus journal article supplement (doi:10.5194/egusphere-2023-967), 2023-06-19
Supplement: Supplementary file 1 [file egusphere-2023-967-supplement.pdf]

Supplementary for manuscript “Evaluation of the TOF-ACSM-CV for PM1.0 and PM2.5 measurements during the RITA-2021 field campaign”

Table S1: The Comparison of the online (ACSM) and offline (Filters) mass concentrations of various chemical components for PM<sub>1.0</sub>.

| Online PM <sub>1.0</sub> VS Offline PM <sub>1.0</sub> |                 |                 |                 |          |          |
|-------------------------------------------------------|-----------------|-----------------|-----------------|----------|----------|
| Species                                               | NO <sub>3</sub> | SO <sub>4</sub> | NH <sub>4</sub> | Org/OC   | Total    |
| Slope                                                 | 0.939           | 0.901           | 1.092           | 2.774    | 1.244    |
| Slope_std                                             | 0.089           | 0.159           | 0.104           | 0.918    | 0.136    |
| R <sup>2</sup>                                        | 0.978           | 0.927           | 0.978           | 0.801    | 0.971    |
| Intercept                                             | -0.186          | -0.316          | 0.089           | -0.929   | -1.146   |
| T-statistic                                           | 6.390           | 24.294          | -7.838          | -3.851   | -0.261   |
| P-value                                               | 2.38E-05        | 3.22E-12        | 2.80E-06        | 2.31E-03 | 7.98E-01 |

Table S2: The Comparison of the online (ACSM and MAAP) and offline (Filters) mass concentrations of various chemical components for PM<sub>2.5</sub>.

| ACSM +MAAP PM <sub>2.5</sub> VS Filter PM <sub>2.5</sub> in May 2021 |                 |                 |                 |          |          |          |
|----------------------------------------------------------------------|-----------------|-----------------|-----------------|----------|----------|----------|
| Species                                                              | NO <sub>3</sub> | SO <sub>4</sub> | NH <sub>4</sub> | Org/OC   | eBC/EC   | Total    |
| Slope                                                                | 0.884           | 0.989           | 0.958           | 2.111    | 1.550    | 1.135    |
| Slope_std                                                            | 0.100           | 0.241           | 0.149           | 1.272    | 0.441    | 0.172    |
| R <sup>2</sup>                                                       | 0.968           | 0.870           | 0.942           | 0.548    | 0.830    | 0.945    |
| Intercept                                                            | -0.394          | -0.477          | 0.161           | -0.103   | 0.013    | -1.126   |
| T-statistic                                                          | 9.137           | 15.513          | -3.754          | -4.941   | -6.949   | 1.376    |
| P-value                                                              | 5.08E-07        | 9.11E-10        | 2.41E-03        | 3.42E-04 | 1.01E-05 | 1.92E-01 |

Table S3: The Comparison of the online (ACSM and MAAP) and offline (Filters) mass concentrations of various chemical components for PM<sub>2.5</sub>.

| ACSM +MAAP PM <sub>2.5</sub> VS Filter PM <sub>2.5</sub> in Sep 2021 |                 |                 |                 |          |          |          |
|----------------------------------------------------------------------|-----------------|-----------------|-----------------|----------|----------|----------|
| Species                                                              | NO <sub>3</sub> | SO <sub>4</sub> | NH <sub>4</sub> | Org/OC   | eBC/EC   | Total    |
| Slope                                                                | 0.931           | 0.856           | 1.163           | 1.994    | 1.577    | 1.352    |
| Slope_std                                                            | 0.242           | 0.259           | 0.229           | 0.324    | 0.150    | 0.266    |
| R <sup>2</sup>                                                       | 0.748           | 0.687           | 0.838           | 0.612    | 0.821    | 0.508    |
| Intercept                                                            | 0.809           | 0.260           | 0.012           | 1.104    | 0.003    | 4.614    |
| T-statistic                                                          | -3.628          | -0.484          | -1.116          | -6.361   | -5.578   | -6.312   |
| P-value                                                              | 1.10E-02        | 6.46E-01        | 3.07E-01        | 1.17E-06 | 8.42E-06 | 1.11E-06 |

Table S4: The Molar mass concentrations (Mol m<sup>-3</sup>) from Filter samples.

| Date           | Molar mass<br>(Mol m <sup>-3</sup> ) |                            | Molar mass<br>(Mol m <sup>-3</sup> ) |                            |
|----------------|--------------------------------------|----------------------------|--------------------------------------|----------------------------|
|                | Cation<br>PM <sub>1.0</sub>          | Anion<br>PM <sub>1.0</sub> | Cation<br>PM <sub>2.5</sub>          | Anion<br>PM <sub>2.5</sub> |
| 2021-5-10      | 0.026                                | 0.042                      | 0.029                                | 0.055                      |
| 2021-5-11      | 0.053                                | 0.070                      | 0.065                                | 0.095                      |
| 2021-5-12      | 0.038                                | 0.059                      | 0.042                                | 0.085                      |
| 2021-5-13      | 0.045                                | 0.066                      | 0.059                                | 0.089                      |
| 2021-5-14      | 0.079                                | 0.100                      | 0.102                                | 0.133                      |
| 2021-5-15      | 0.068                                | 0.087                      | 0.090                                | 0.115                      |
| 2021-5-16      | 0.019                                | 0.038                      | 0.021                                | 0.059                      |
| 2021-5-17      | 0.030                                | 0.045                      | 0.036                                | 0.061                      |
| 2021-5-18      | 0.035                                | 0.054                      | 0.042                                | 0.071                      |
| 2021-5-19      | 0.048                                | 0.067                      | 0.056                                | 0.089                      |
| 2021-5-20      | 0.049                                | 0.068                      | 0.076                                | 0.100                      |
| 2021-5-21      | 0.004                                | 0.020                      | 0.003                                | 0.030                      |
| 2021-5-22      | 0.010                                | 0.025                      | 0.013                                | 0.034                      |
| 2021-5-23      | 0.022                                | 0.037                      | 0.033                                | 0.058                      |
| Slope          | 1.070                                |                            | 1.005                                |                            |
| R <sup>2</sup> | 0.992                                |                            | 0.958                                |                            |
| Intercept      | 0.015                                |                            | 0.029                                |                            |
| T statistic    | -27.330                              |                            | -18.207                              |                            |
| P value        | 7.170E-13                            |                            | 1.238E-10                            |                            |

**Table S5: The Molar mass concentrations (Mol m<sup>-3</sup>) from ACSM measurements.**

| Date           | Molar mass<br>(Mol m <sup>-3</sup> ) |                            | Molar mass<br>(Mol m <sup>-3</sup> ) |                            |
|----------------|--------------------------------------|----------------------------|--------------------------------------|----------------------------|
|                | Cation<br>PM <sub>1.0</sub>          | Anion<br>PM <sub>1.0</sub> | Cation<br>PM <sub>2.5</sub>          | Anion<br>PM <sub>2.5</sub> |
| 2021-5-10      | 0.031                                | 0.027                      | 0.028                                | 0.027                      |
| 2021-5-11      | 0.064                                | 0.058                      | 0.065                                | 0.064                      |
| 2021-5-12      | 0.043                                | 0.040                      | 0.054                                | 0.058                      |
| 2021-5-13      | 0.062                                | 0.056                      | 0.076                                | 0.076                      |
| 2021-5-14      | 0.093                                | 0.082                      | 0.111                                | 0.105                      |
| 2021-5-15      | 0.073                                | 0.064                      | 0.088                                | 0.084                      |
| 2021-5-16      | 0.026                                | 0.022                      | 0.032                                | 0.032                      |
| 2021-5-17      | 0.040                                | 0.032                      | 0.047                                | 0.043                      |
| 2021-5-18      | 0.046                                | 0.040                      | 0.057                                | 0.054                      |
| 2021-5-19      | 0.056                                | 0.049                      | 0.068                                | 0.064                      |
| 2021-5-20      | 0.058                                | 0.053                      | 0.074                                | 0.070                      |
| 2021-5-21      | 0.007                                | 0.007                      | 0.008                                | 0.010                      |
| 2021-5-22      | 0.018                                | 0.014                      | 0.021                                | 0.019                      |
| 2021-5-23      | 0.025                                | 0.022                      | 0.033                                | 0.032                      |
| Slope          | 0.903                                |                            | 0.951                                |                            |
| R <sup>2</sup> | 0.996                                |                            | 0.994                                |                            |
| Intercept      | -0.001                               |                            | 0.001                                |                            |
| T statistic    | 7.716                                |                            | 2.520                                |                            |
| P value        | 3.315E-06                            |                            | 2.559E-02                            |                            |

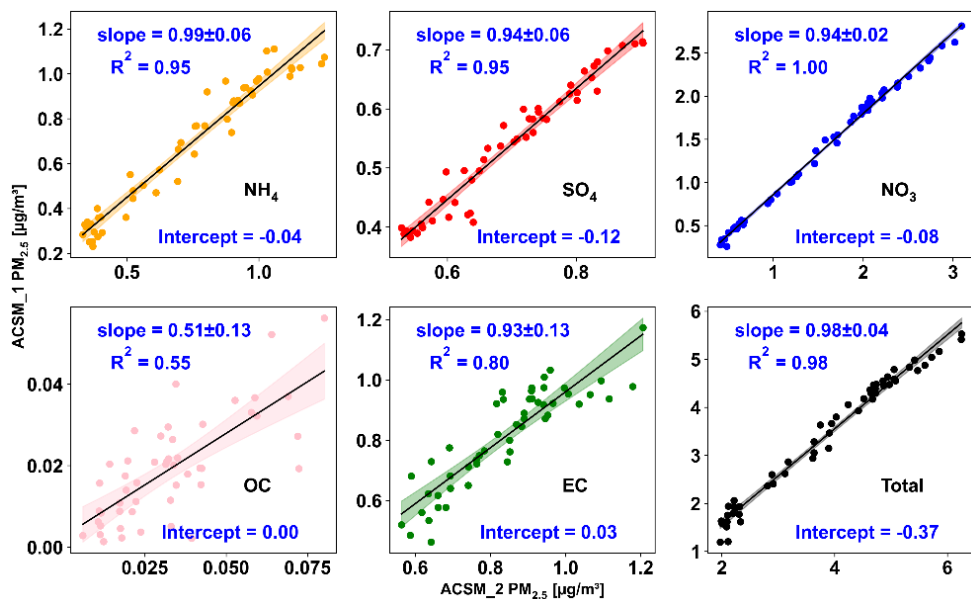

Figure S 1 Intercomparison and correlation of two collocated TOF-ACSM with PM<sub>2.5</sub> measurements. The light shades represent the 95% confidence interval.

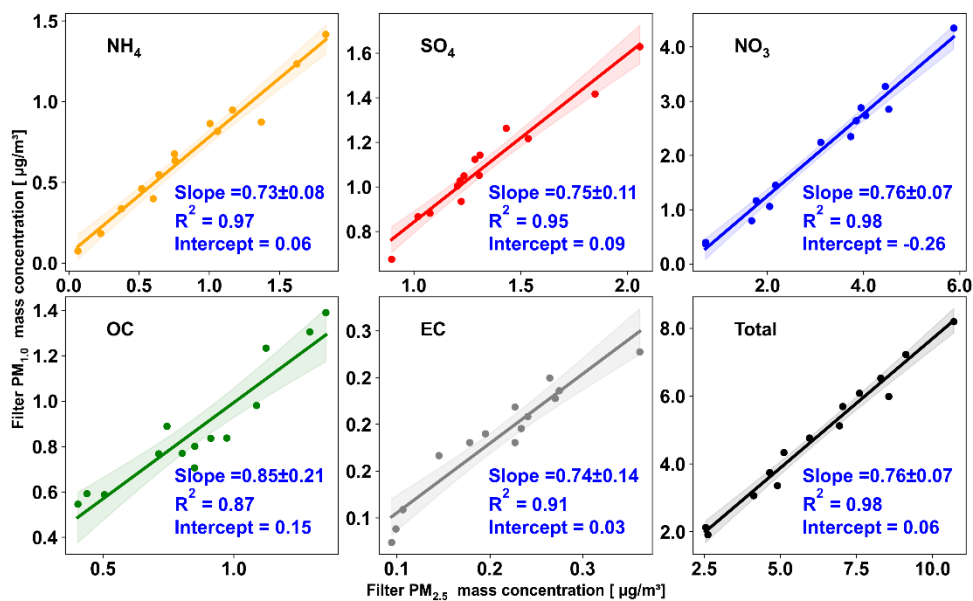

15 Figure S 2 The correlation between the PM<sub>1.0</sub> and PM<sub>2.5</sub> measured by Filters. The light shades represent the 95% confidence interval.

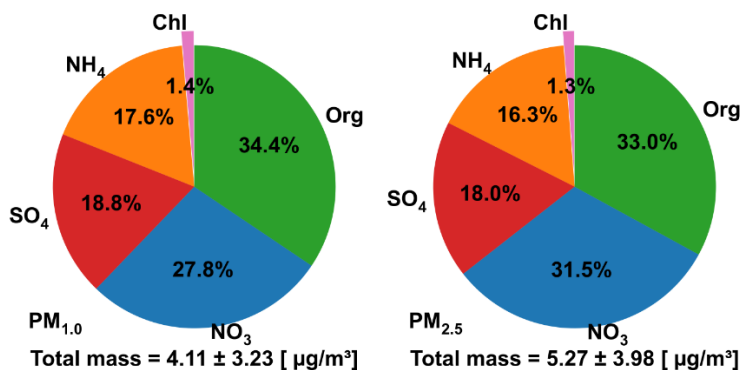

20 Figure S 3 The ACSM measured hourly chemical mass concentration fraction of the NR-PM<sub>1.0</sub> and NR-PM<sub>2.5</sub>, and the corresponding mass concentration of each components.

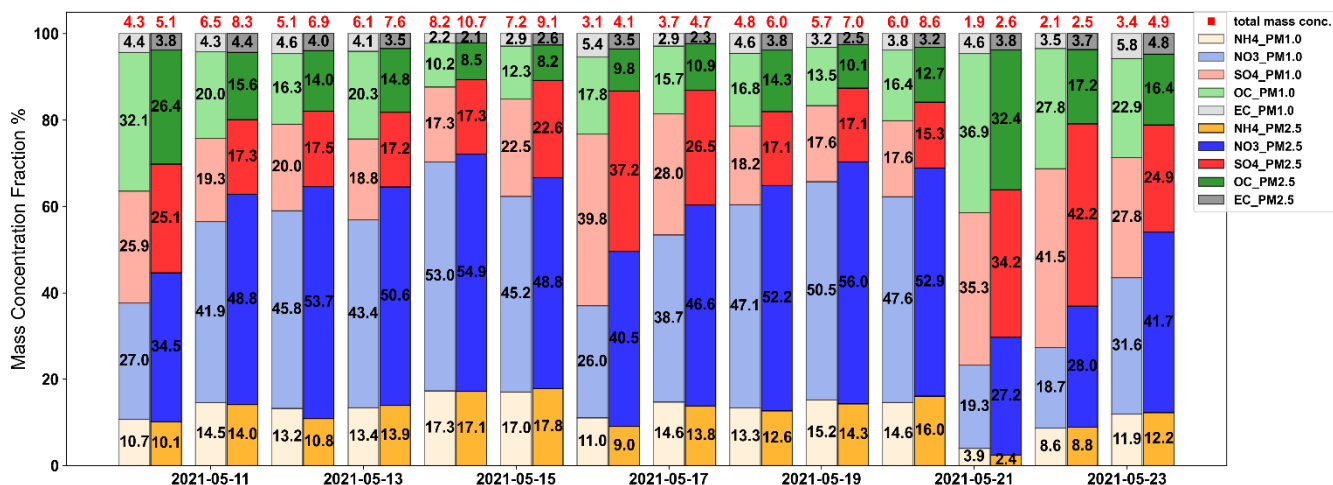

Figure S 4 The daily mass fraction of the PM<sub>1.0</sub>(left in light colour) and PM<sub>2.5</sub>(right in dark colour) measured by Filters. The total mass was labelled in red at the top of the bar.

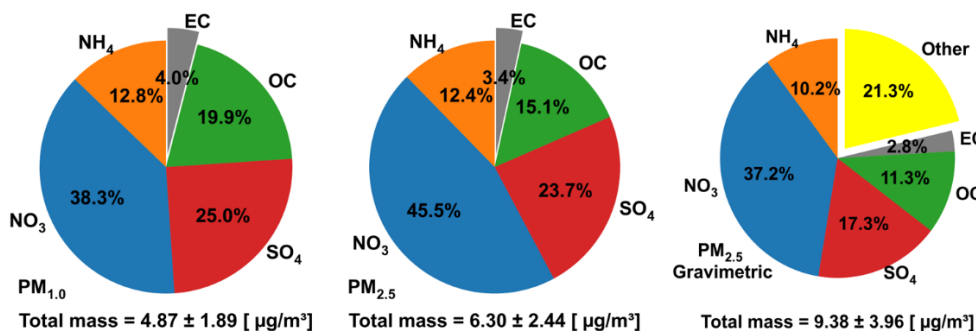

25 Figure S 5 The average mass fraction of each species in the PM<sub>1.0</sub> and PM<sub>2.5</sub> measured by Filters, and the PM<sub>2.5</sub> mass fraction of the total PM<sub>2.5</sub> Gravimetric mass.

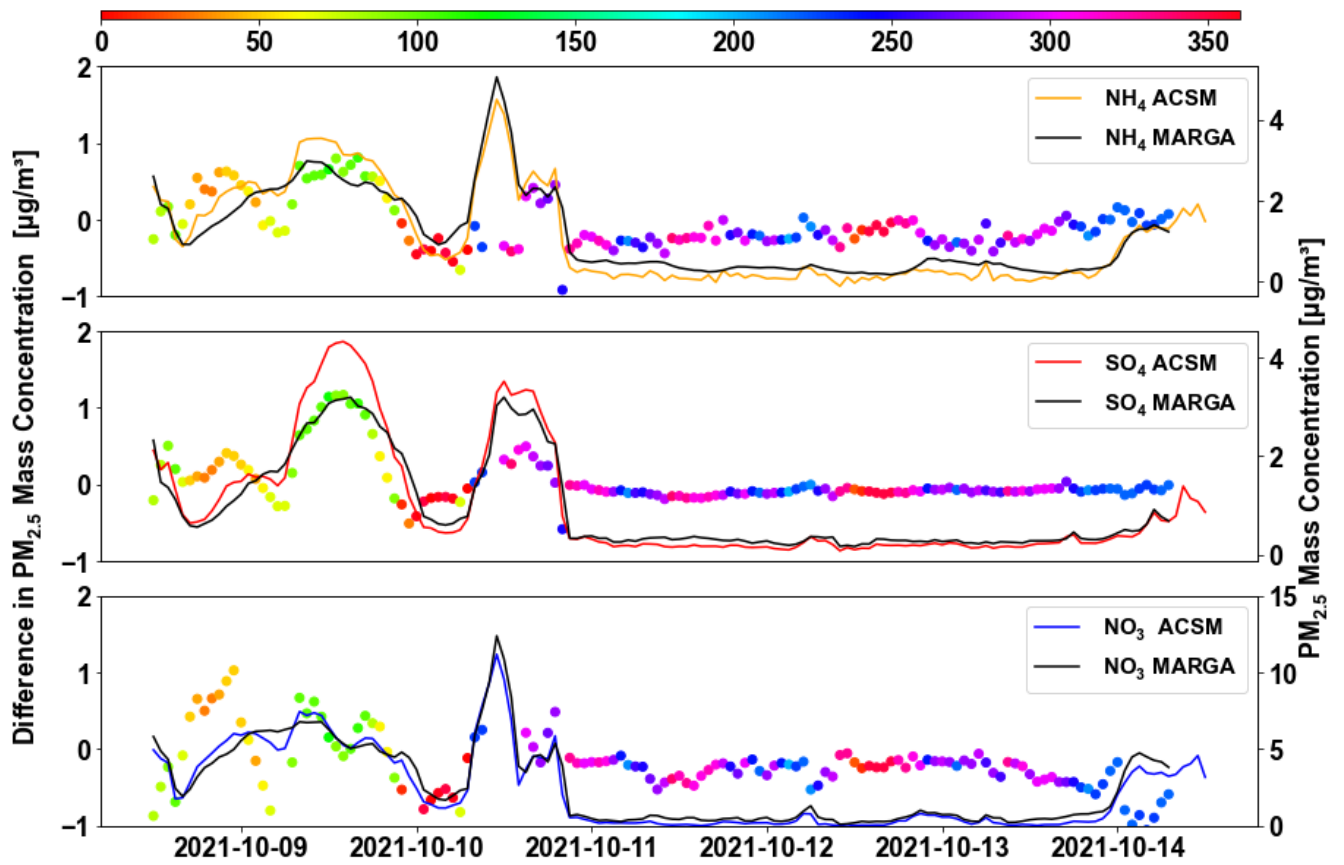

30 Figure S 6 Time series of the differences (y axis at the left) between the ACSM and MARGA in  $\text{PM}_{2.5}$  mass concentration colored by the wind direction.
